# Supplementary material
Source: PubMed Central journal article supplement (PMC548345)
Supplement: nar_33_2_511__1.pdf [file nar_33_2_511__1.pdf]

## SUPPLEMENTARY DATA

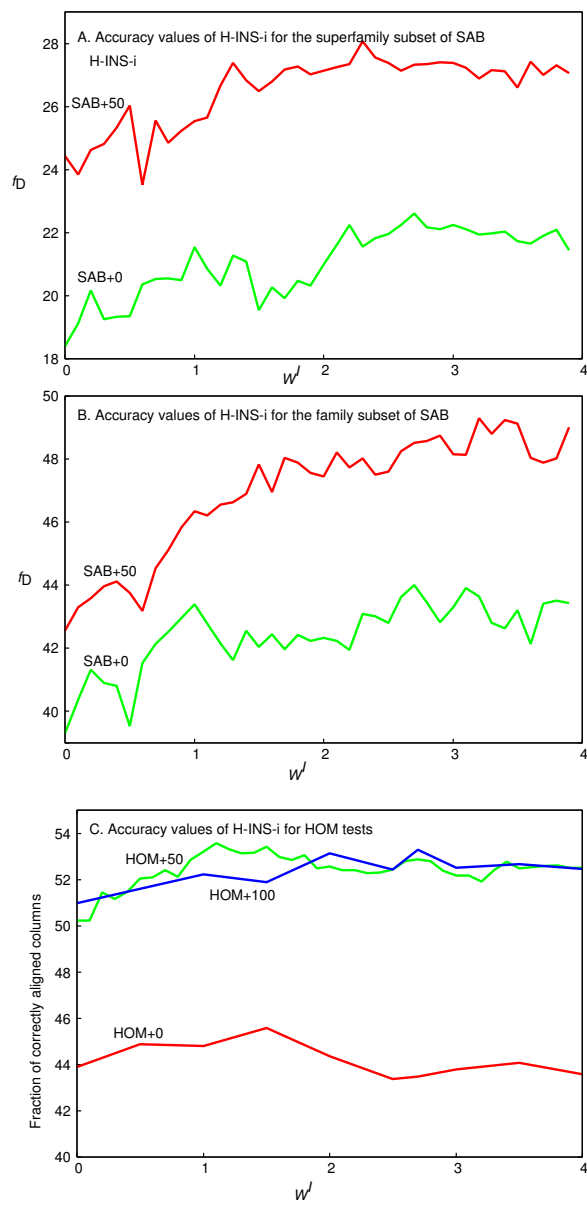

Figure 1:  $W^I$  value versus the accuracy value for the SAB tests (A,B) and the HOM test (C).

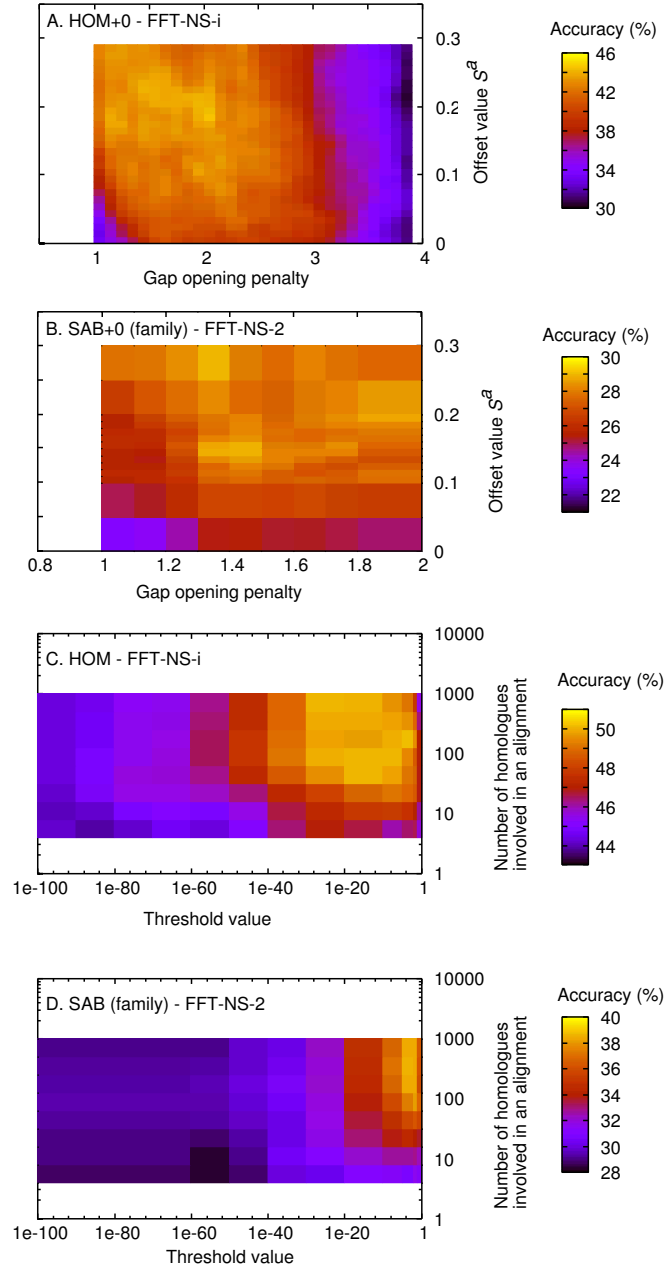

Figure 2: Alignment accuracies on various conditions.

A, Accuracy values of the FFT-NS-i option for the HOM+0 test on various gap opening penalty  $S^{op}$  and offset value  $S^a$ ; B, Accuracy values of the FFT-NS-2 option for the family subset of the SAB+0 test on various gap opening penalty  $S^{op}$  and offset value  $S^a$ ; C, Accuracy values of the FFT-NS-i option for the HOM test on various conditions. D, Accuracy values of the FFT-NS-2 option for the family subset of the SAB test on various conditions.

Table 1: Comparison of accuracy values (%) of multiple sequence alignment programs

| Method                    | Dataset      |              |              |              |              |              | PREFAB<br>(%id=0-20) |
|---------------------------|--------------|--------------|--------------|--------------|--------------|--------------|----------------------|
|                           | HOM+0        | HOM+50       | TWIs+0       | TWIs+50      | TWIf+0       | TWIf+50      |                      |
| G-INS-i                   | 42.58        | 53.85        | 20.73        | <b>29.58</b> | 41.68        | <b>51.11</b> | 46.75                |
| H-INS-i                   | 43.20        | <b>53.37</b> | <b>23.36</b> | 27.87        | 42.78        | 50.29        | <b>48.22</b>         |
| F-INS-i                   | 43.14        | 53.72        | 22.03        | 27.25        | 43.21        | 47.59        | 48.00                |
| NW-NS-i                   | 43.57        | 50.68        | 18.16        | 22.79        | 37.46        | 44.90        | 46.00                |
| FFT-NS-i                  | 43.57        | 50.68        | 18.16        | 22.76        | 37.46        | 44.85        | 45.72                |
| FFT-NS-i2                 | 43.40        | 50.22        | 17.03        | 22.19        | 36.09        | 44.56        | 45.36                |
| NW-NS-2                   | 35.94        | 44.42        | 12.89        | 17.49        | 30.27        | 36.95        | 43.15                |
| FFT-NS-2                  | 35.94        | 44.42        | 12.89        | 17.49        | 30.27        | 37.08        | 43.19                |
| FFT-NS-1                  | 33.30        | 42.59        | 11.01        | 16.72        | 25.35        | 32.16        | 40.90                |
| PROBCONS                  | <b>47.95</b> | 51.59        | 22.06        | 22.53        | <b>44.48</b> | 44.86        | 45.63                |
| TCoffee 2.02              | 43.49        | 49.71        | 21.80        | 21.85        | 44.20        | 45.18        | 45.30                |
| TCoffee 1.37              | 41.97        | 42.63        | 17.12        | 15.20        | 34.14        | 22.62        | 40.92                |
| FFT-NS-i 3.88             | 38.12        | 45.18        | 12.88        | 17.56        | 30.67        | 34.67        | 42.11                |
| MUSCLE-i                  | 43.44        | 46.90        | 15.67        | 19.61        | 36.38        | 38.17        | 42.77                |
| MUSCLE-p                  | 39.46        | 43.39        | 11.90        | 17.45        | 30.95        | 36.13        | 40.85                |
| MUSCLE-2                  | 35.59        | 42.44        | 10.64        | 15.09        | 26.02        | 32.77        | 39.37                |
| MUSCLE-fast               | 33.95        | 37.97        | 11.00        | 12.37        | 28.28        | 30.06        | 38.44                |
| CLUSTAL W 1.38            | 36.77        | 37.33        | 12.76        | 12.91        | 34.28        | 34.95        | 33.96                |
| CLUSTAL W 1.38 -quicktree | 34.25        | 38.07        | 11.48        | 12.46        | 32.78        | 33.89        | 33.89                |
| Align-m                   | 31.26        | 31.41        | 17.08        | 15.63        | 33.74        | 29.40        |                      |
| POA progressive, local    | 21.15        | 33.30        | 8.990        | 6.142        | 22.75        | 20.58        | 29.85                |
| POA progressive, global   | 26.35        | 33.66        | 9.431        | 8.108        | 27.29        | 23.76        | 28.57                |
